# Supplementary material
Source: publisher site journal article supplement (https://static.cambridge.org/content/id/urn:cambridge.org:id:article:S0007114520002780/resource/name/S0007114520002780supp002.docx)
Supplement: Supplementary file 1 [file S0007114520002780supp002.docx]

**Supplementary material 2.** *ADIPOQ*-rs2241766 and *LEP*-7799039 allele frequencies according to cohort period.PREDI Study, Brazil, 2012-2018.

| **Cohort period** |  | **Allele frequency** | | | | | |
| --- | --- | --- | --- | --- | --- | --- | --- |
| **Infant age** | ***ADIPOQ*** | | **HWE *p1*** | ***LEP*** | | **HWE *p1*** |
|  | **T** | **G** | **G** | **A** |
| Baseline | Birth | 0.88 | 0.12 | 0.35 | 0.62 | 0.38 | 0.83 |
| 1st follow-up | 1-2 years | 0.87 | 0.13 | 0.15 | 0.63 | 0.37 | 0.88 |
| 2nd follow-up | 4-5 years | 0.87 | 0.13 | 0.36 | 0.62 | 0.38 | 0.99 |
| 3rd follow-up | 6 years | 0.87 | 0.13 | 0.23 | 0.61 | 0.39 | 0.93 |

1p-values refers to chi-square test. HWE, Hardy-Weinberg equilibrium; *ADIPOQ*-T = wild-type allele; *ADIPOQ*-G = risk allele; *LEP*-G = wild-type genotype; *LEP*-A = risk allele.
